# Supplementary material for: KDM1A promotes thyroid cancer progression and maintains stemness through the Wnt/β-catenin signaling pathway
Source: Theranostics. 2022 Jan 3;12(4):1500–17. doi: 10.7150/thno.66142 (PMC8825597; doi:10.7150/thno.66142)
Supplement: Supplementary file 1 — Supplementary figures, tables, and additional files. [file thnov12p1500s1.pdf]

## **Supplementary Files**

### **KDM1A promotes thyroid cancer progression and maintains stemness through the Wnt/ $\beta$ -catenin signaling pathway**

Wei Zhang, Xianhui Ruan, Yaoshuang Li, Jingtai Zhi, Linfei Hu, Xiukun Hou, Xianle Shi, Xin Wang, Jinpeng Wang, Weike Ma, Pengfei Gu, Xiangqian Zheng and Ming Gao

### **Supplementary figure legends and supplementary figures**

Figure S1

Figure S2

Figure S3

Figure S4

Figure S5

Figure S6

Figure S7

Figure S8

Figure S9

Figure S10

Figure S11

### **Supplementary tables**

Table S1

Table S2

Table S3

### **Additional file 1**

### **Additional file 2**

## Supplementary figure legends and supplementary figures

### Figure S1

- A. CSCs (spheres) derived from three thyroid cancer cell lines have higher expression of stemness-associated genes than their corresponding non-CSCs (monolayer cells).
- B. Phylogenetic analysis of the histone methylation modifiers included in this study.
- C. The relative expression levels of KDM1A were assessed by qPCR in 21 paired normal thyroid tissues and PTC tissues, relative KDM1A expression data was normalized with  $\beta$ -actin and represented on a log2 scale.
- D. Comparison of the KDM1A mRNA levels between all normal thyroid tissues and PTC tissues derived from the TCGA database.
- E. Comparison of the KDM1A mRNA levels between paired normal thyroid tissues and PTC tissues derived from the TCGA database.
- F. The protein expression levels of KDM1A were assessed by Western blotting in a cohort of thyroid cancer cell lines and a normal thyroid cell line.
- G. The relative expression levels of KDM1A were measured by qPCR in a cohort of thyroid cancer cell lines and a normal thyroid cell line.

Data are shown as the mean  $\pm$  SD of three replicates. (\* $P < 0.05$ , \*\* $P < 0.01$ , \*\*\* $P < 0.001$ )

### Figure S2

- A, B. Analysis of the levels of H3K4me1, H3K4me2, H3K4me3, H3K9me1, H3K9me2 and H3K9me3 in ATC cells following KDM1A knockdown (A) and in PTC cells following KDM1A overexpression (B) by western blotting.
- C, D. The relative expression levels of some CSC markers were measured by qPCR in shKDM1A-transfected ATC cells (C) and KDM1A overexpression plasmid-transfected PTC cells (D).

Data are shown as the mean  $\pm$  SD of three replicates. (\* $P < 0.05$ , \*\* $P < 0.01$ , \*\*\* $P < 0.001$ )

### Figure S3

- A, B. The cell migration and invasion abilities of ATC cells with KDM1A knockdown (A) and PTC cells with KDM1A overexpression (B). The scale bar is 200  $\mu$ m.

Data are shown as the mean  $\pm$  SD of three replicates. (\*\* $P < 0.01$ , \*\*\* $P < 0.001$ )

### Figure S4

- A. Cell viability of KDM1A overexpression plasmid-transfected PTC cells after treatment with doxorubicin at different concentration gradients for 48 h.
- B. Flow cytometry was performed to measure the apoptotic proportion of KDM1A-silenced ATC cells after treatment with doxorubicin at a concentration of 100 nmol/L for 3 days.

C. Cell viability of shKDM1A-transfected ATCs after treatment with sorafenib at different concentrations for 48 h.

Data are shown as the mean  $\pm$  SD of three replicates. (\*\* $P < 0.01$ , \*\*\* $P < 0.001$ )

#### **Figure S5**

A. Representative GO term analysis of upregulated genes (red) and downregulated genes (blue) after transfection with shKDM1A.

B. Quantitative PCR validation of differential gene expression related to the Wnt/ $\beta$ -catenin signaling pathway in ATC cells with KDM1A knockdown.

E. The expression levels of  $\beta$ -catenin, DKK1 and APC2 in xenografts of each group were assessed by immunohistochemical staining. Unpaired two-tailed Student's *t*-test was used to analyzed the difference of positive staining cells ratio between different groups. The scale bar is 50  $\mu$ m.

Data are shown as the mean  $\pm$  SD of three replicates. (\*\* $P < 0.01$ , \*\*\* $P < 0.001$ )

#### **Figure S6**

A. A TOP/FOP luciferase reporter assay was utilized to detect the transcriptional activity of the canonical Wnt signaling pathway in PTC cells with KDM1A overexpression.

B, C. Western blotting (B) and qPCR (C) validation of differential gene expression related to the Wnt/ $\beta$ -catenin signaling pathway in PTC cells with KDM1A overexpression.

D. Immunofluorescence of PTC cells with or without KDM1A overexpression for  $\beta$ -catenin (orange) and 4',6-diamidino-2-phenylindole (DAPI) (blue). The scale bar is 20  $\mu$ m.

Data are shown as the mean  $\pm$  SD of three replicates. (\*\* $P < 0.01$ , \*\*\* $P < 0.001$ )

#### **Figure S7**

A. Schematic of the ChIP primers designed for the DKK1 promoter regions (1–7).

B, C, D. The enrichment levels of KDM1A (B), H3K4me1 (C) and H3K4me2 (D) in different regions of the DKK1 gene promoter in CAL-62 ATC cells with or without KDM1A knockdown were determined by ChIP assay.

Data are shown as the mean  $\pm$  SD of three replicates.

#### **Figure S8**

A. The protein expression of HIF-1 $\alpha$  was examined by Western blotting in PTC cells with KDM1A overexpression.

B, C. The relative mRNA expression of HIF-1 $\alpha$  was measured by qPCR in shKDM1A-transfected ATCs (B) and PTC cells with KDM1A overexpression.

D, E. Introduction of HIF-1 $\alpha$  to ATC cells rescued their attenuated sphere formation ability (D) and increased their sensitivity to doxorubicin (E) caused by KDM1A knockdown.

F. Overexpression of HIF-1 $\alpha$  in ATC cells with KDM1A knockdown restored the increased mRNA

expression of DKK1.

Data are shown as the mean  $\pm$  SD of three replicates. (\* $P$  < 0.05, \*\* $P$  < 0.01, \*\*\* $P$  < 0.001)

#### **Figure S9**

A. The relative expression levels of miR-146a were measured by qPCR in KDM1A overexpression plasmid-transfected PTC cells.

B, C. Introduction of miR-146a mimic to ATC cells restored their attenuated sphere formation ability (B) and increased their response to doxorubicin (C) caused by KDM1A overexpression.

D. Western blotting validated that the introduction of a miR-146a inhibitor to PTC cells could restore the increased  $\beta$ -catenin and CSC marker expression induced by KDM1A overexpression.

E. Quantitative PCR validated that the introduction of a miR-146a inhibitor to PTC cells could restore the decreased DKK1 expression induced by KDM1A knockdown.

F, G. Introduction of a miR-146a inhibitor to PTC cells restored the enhanced sphere formation ability (F) and the resistance to doxorubicin (G) caused by KDM1A overexpression.

Data are shown as the mean  $\pm$  SD of three replicates. (\*\* $P$  < 0.01, \*\*\* $P$  < 0.001)

#### **Figure S10**

A. Flow cytometry apoptosis analysis confirmed the efficacy of combination therapy in which ATCs were pretreated with 1  $\mu$ M GSK-LSD1 for 5 days and then subjected to 100 nmol/L doxorubicin treatment for another 3 days.

B. The cell migration and invasion abilities of ATC cells that had been treated with GSK-LSD1 (1  $\mu$ M) for 5 days. The scale bar is 200  $\mu$ m.

Data are shown as the mean  $\pm$  SD of three replicates. (\*\* $P$  < 0.01, \*\*\* $P$  < 0.001)

#### **Figure S11**

A. The alteration in body weight in each group of mice after treatment.

B. The expression levels of Ki67, cleaved caspase 3, NANOG,  $\beta$ -catenin, APC2 and DKK1 in xenografts of each group were assessed by immunohistochemical staining. Unpaired two-tailed Student's *t*-test was used to analyzed the difference of positive staining cells ratio between different groups. The scale bar is 50  $\mu$ m.

Data are shown as the mean  $\pm$  SD of three replicates. (\* $P$  < 0.05, \*\*\* $P$  < 0.001)

Figure S1

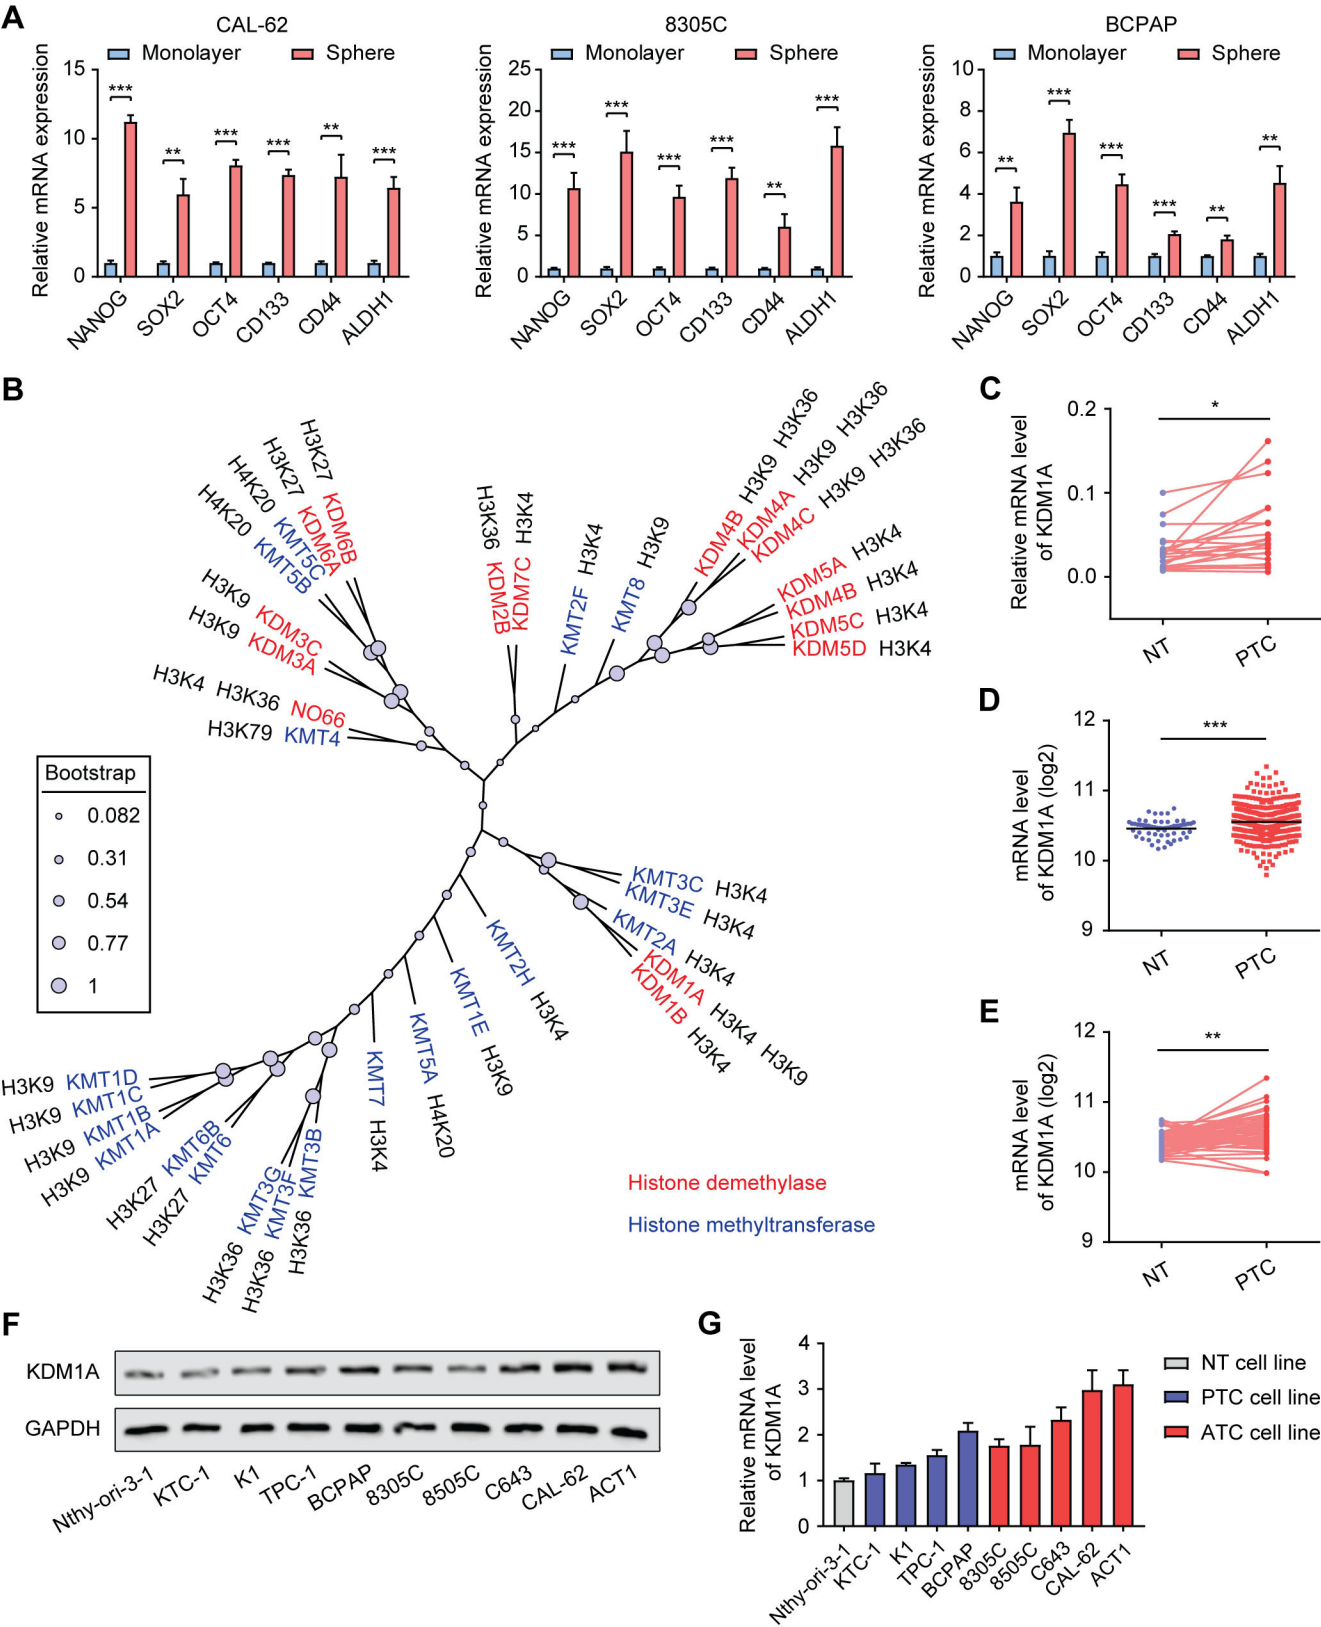

**Figure S2**

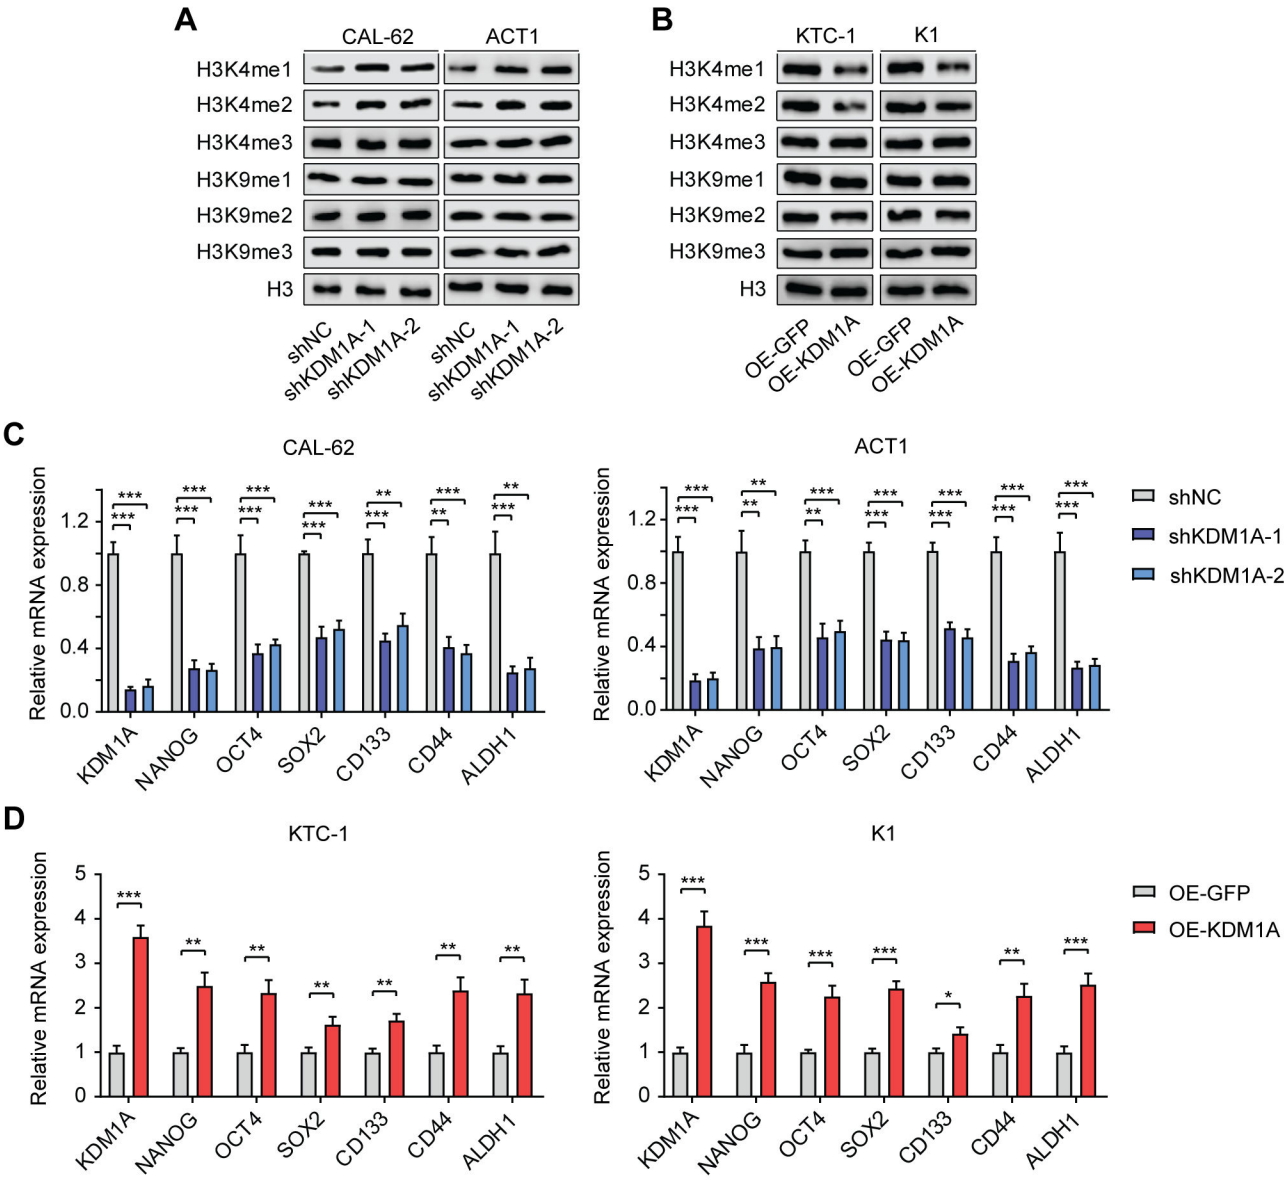

**Figure S3**

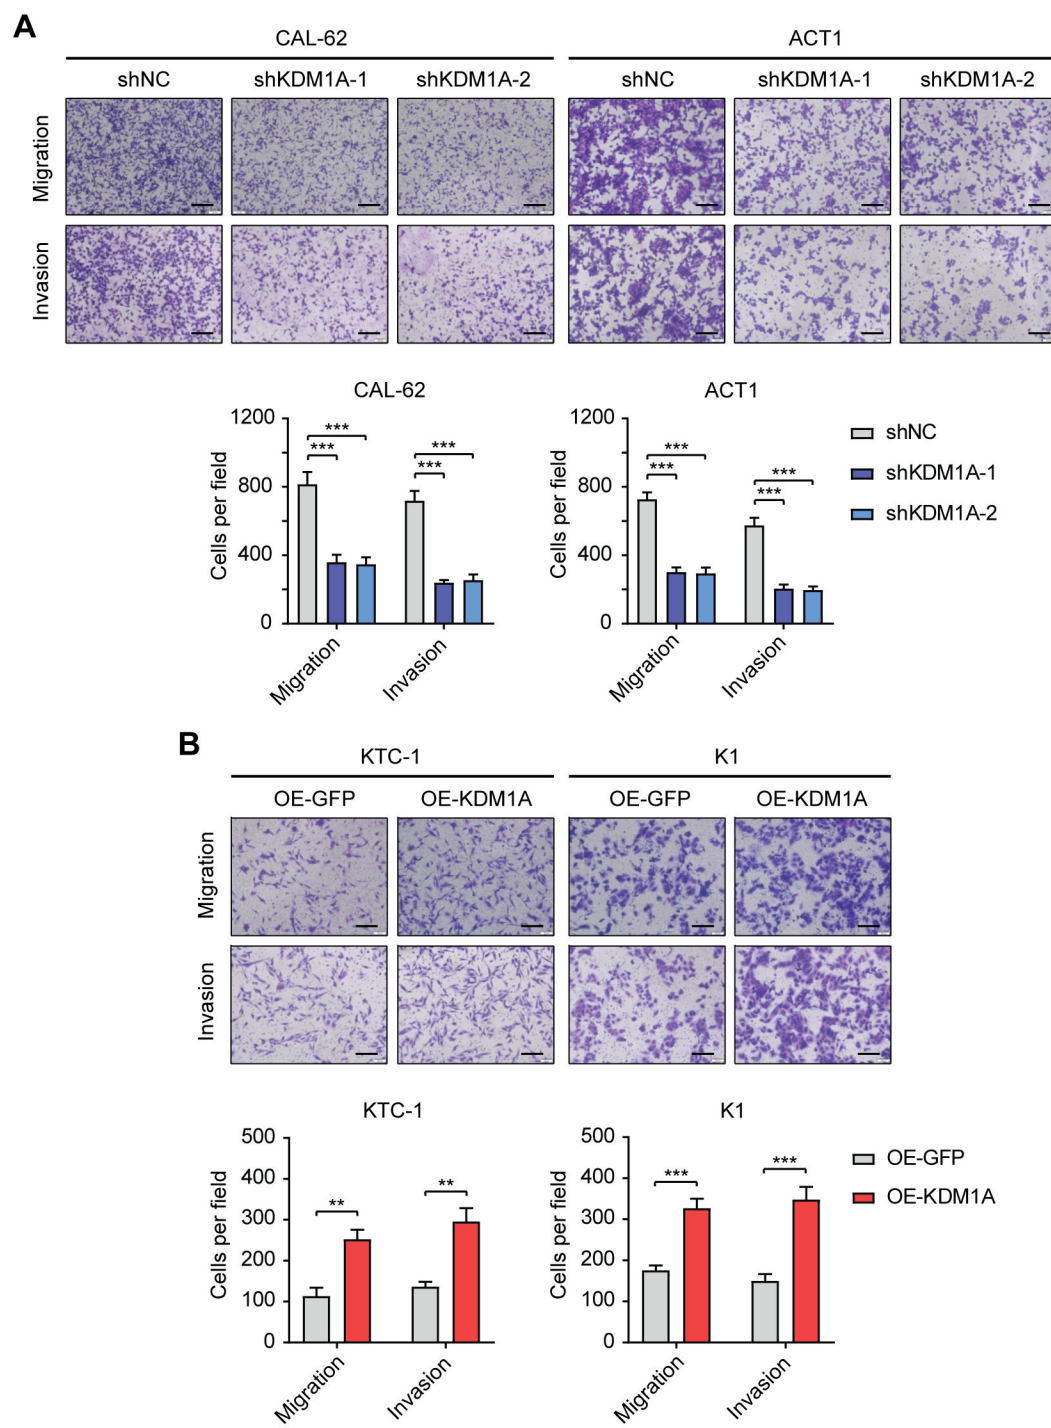

Figure S4

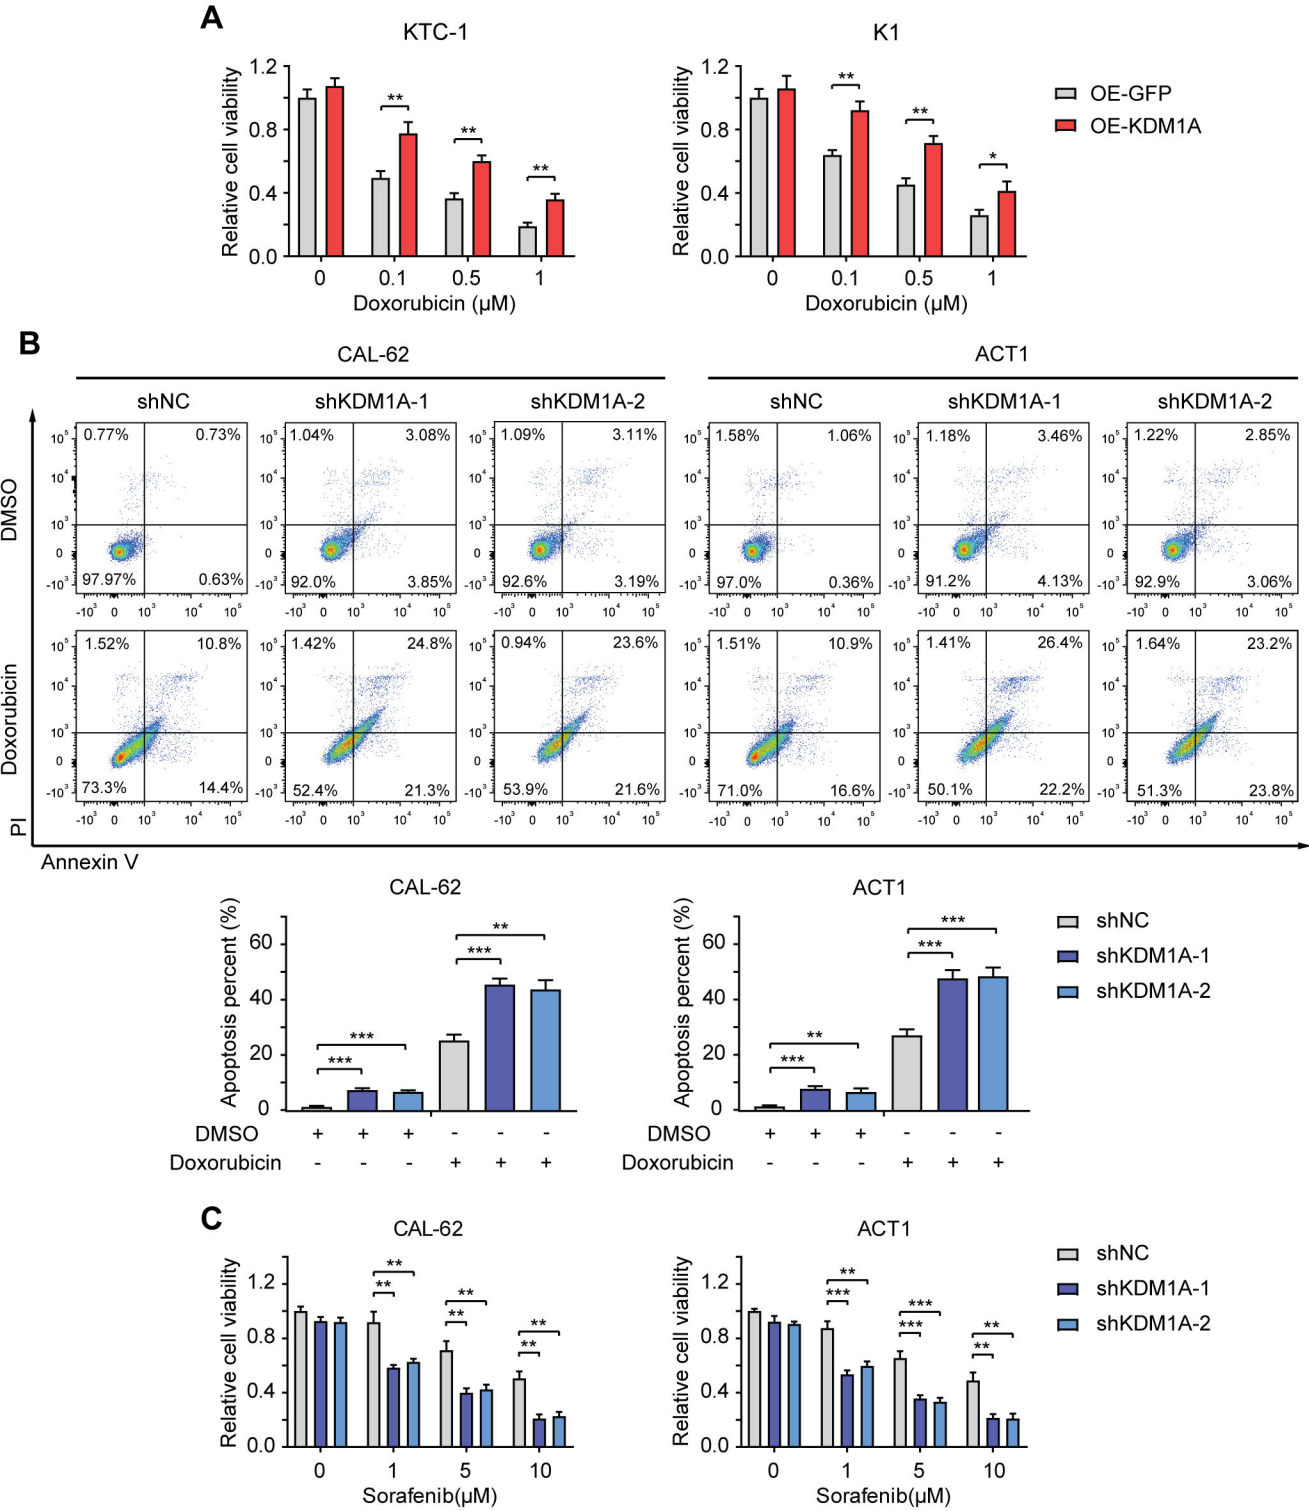

**Figure S5**

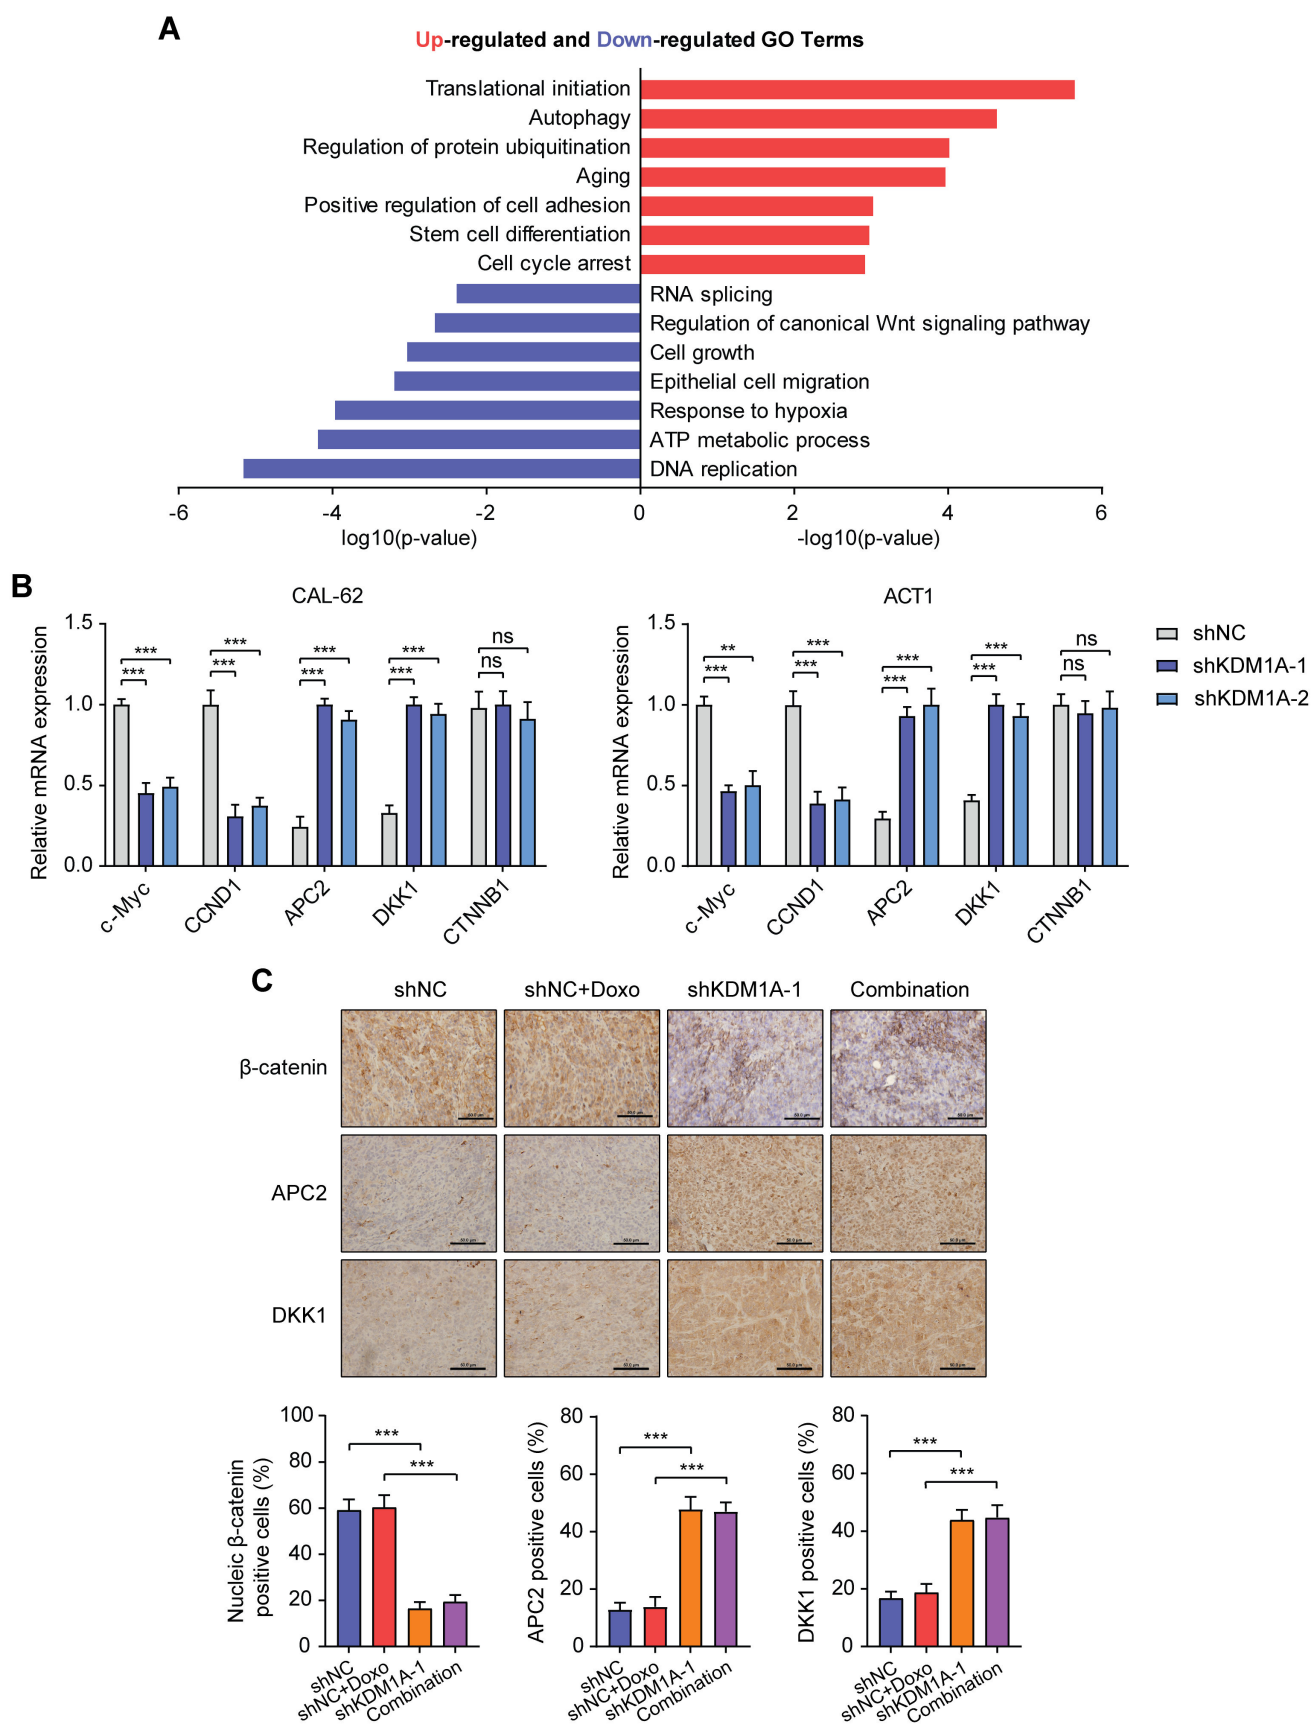

**Figure S6**

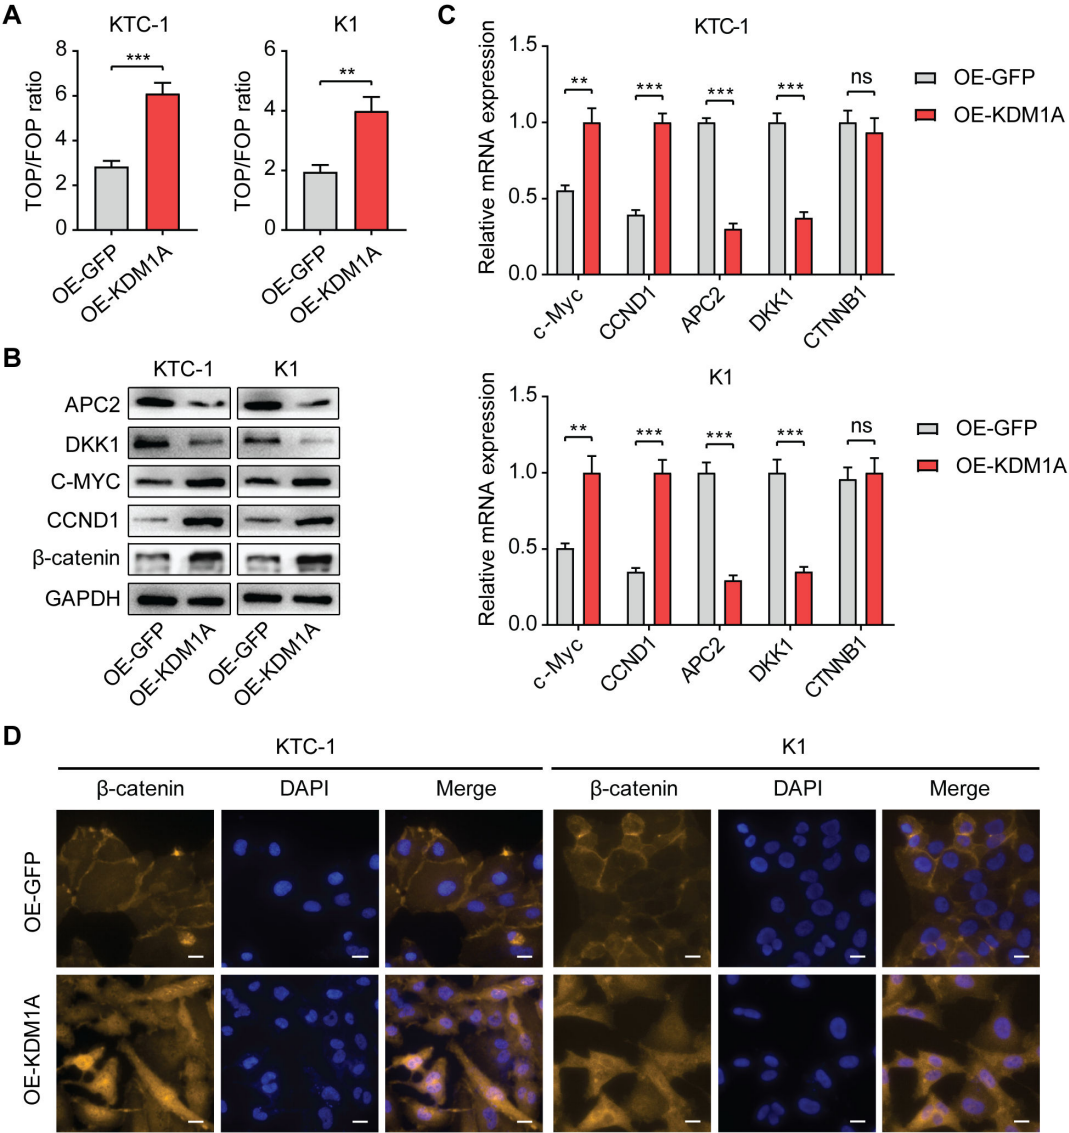

Figure S7

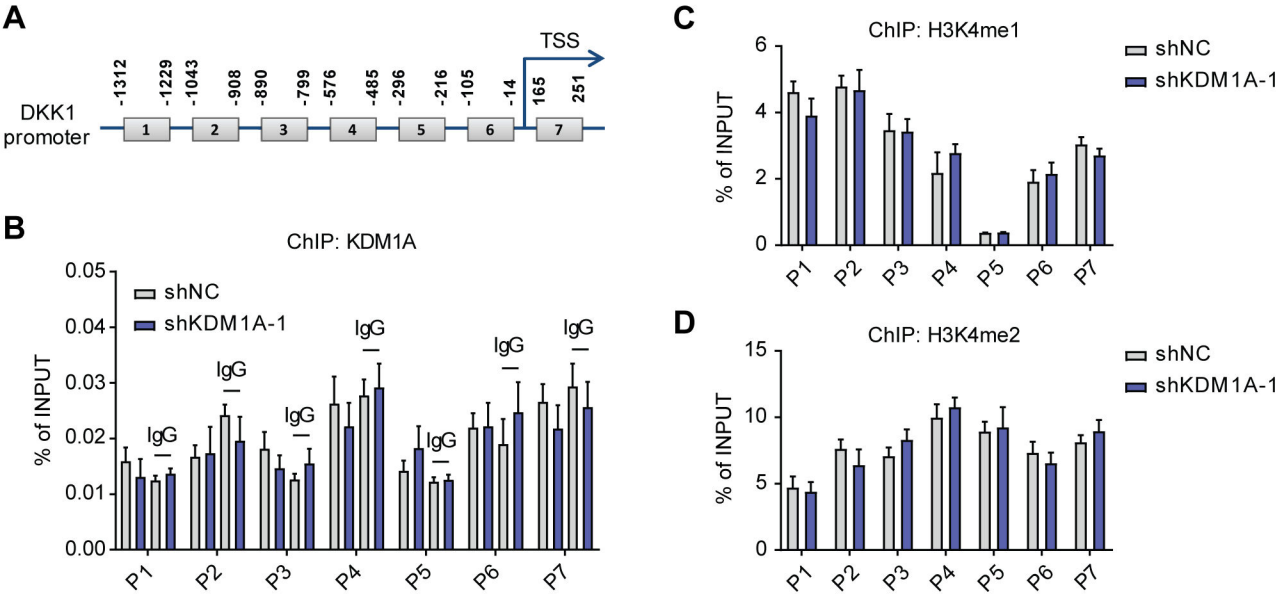

**Figure S8**

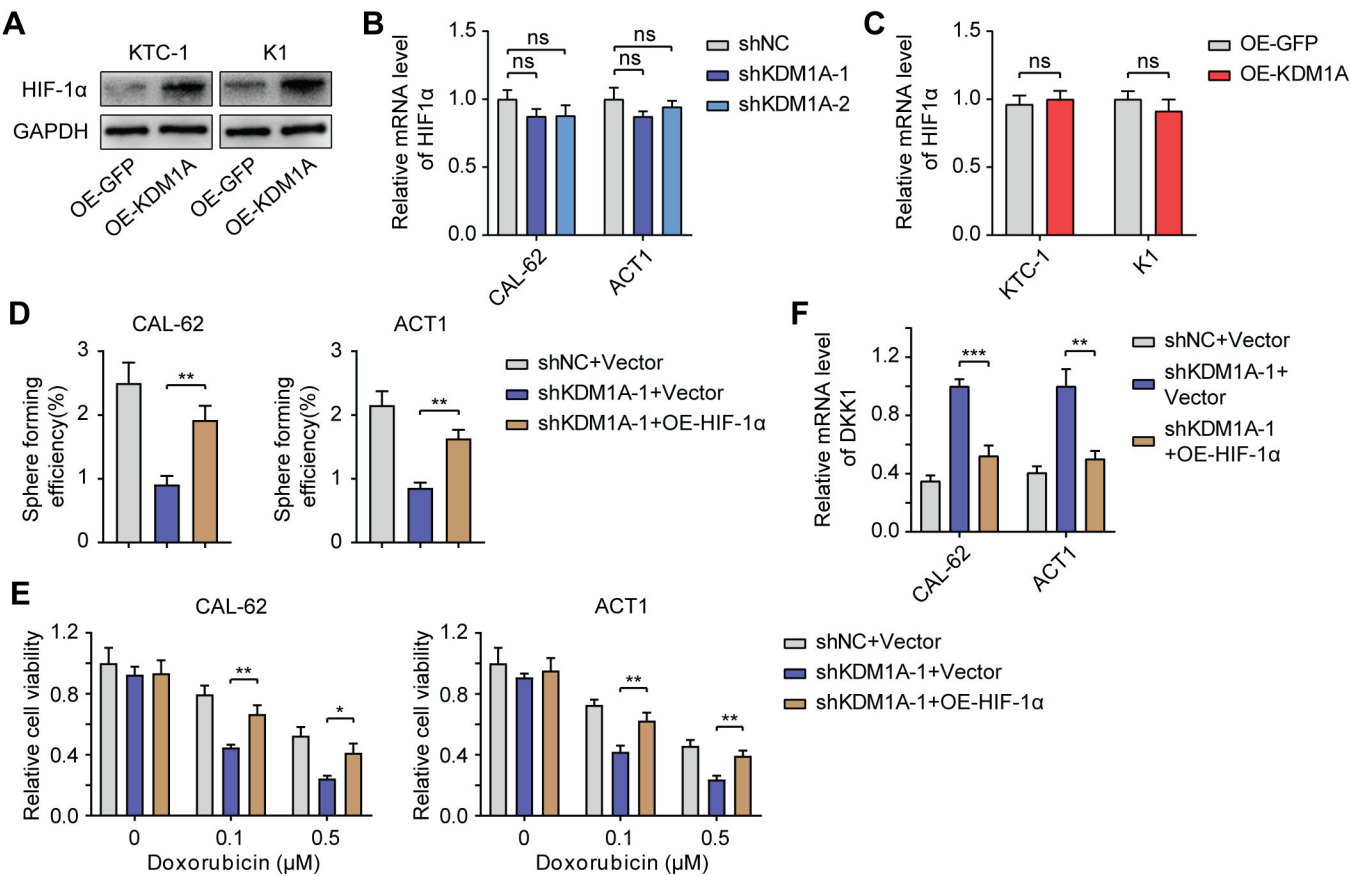

**Figure S9**

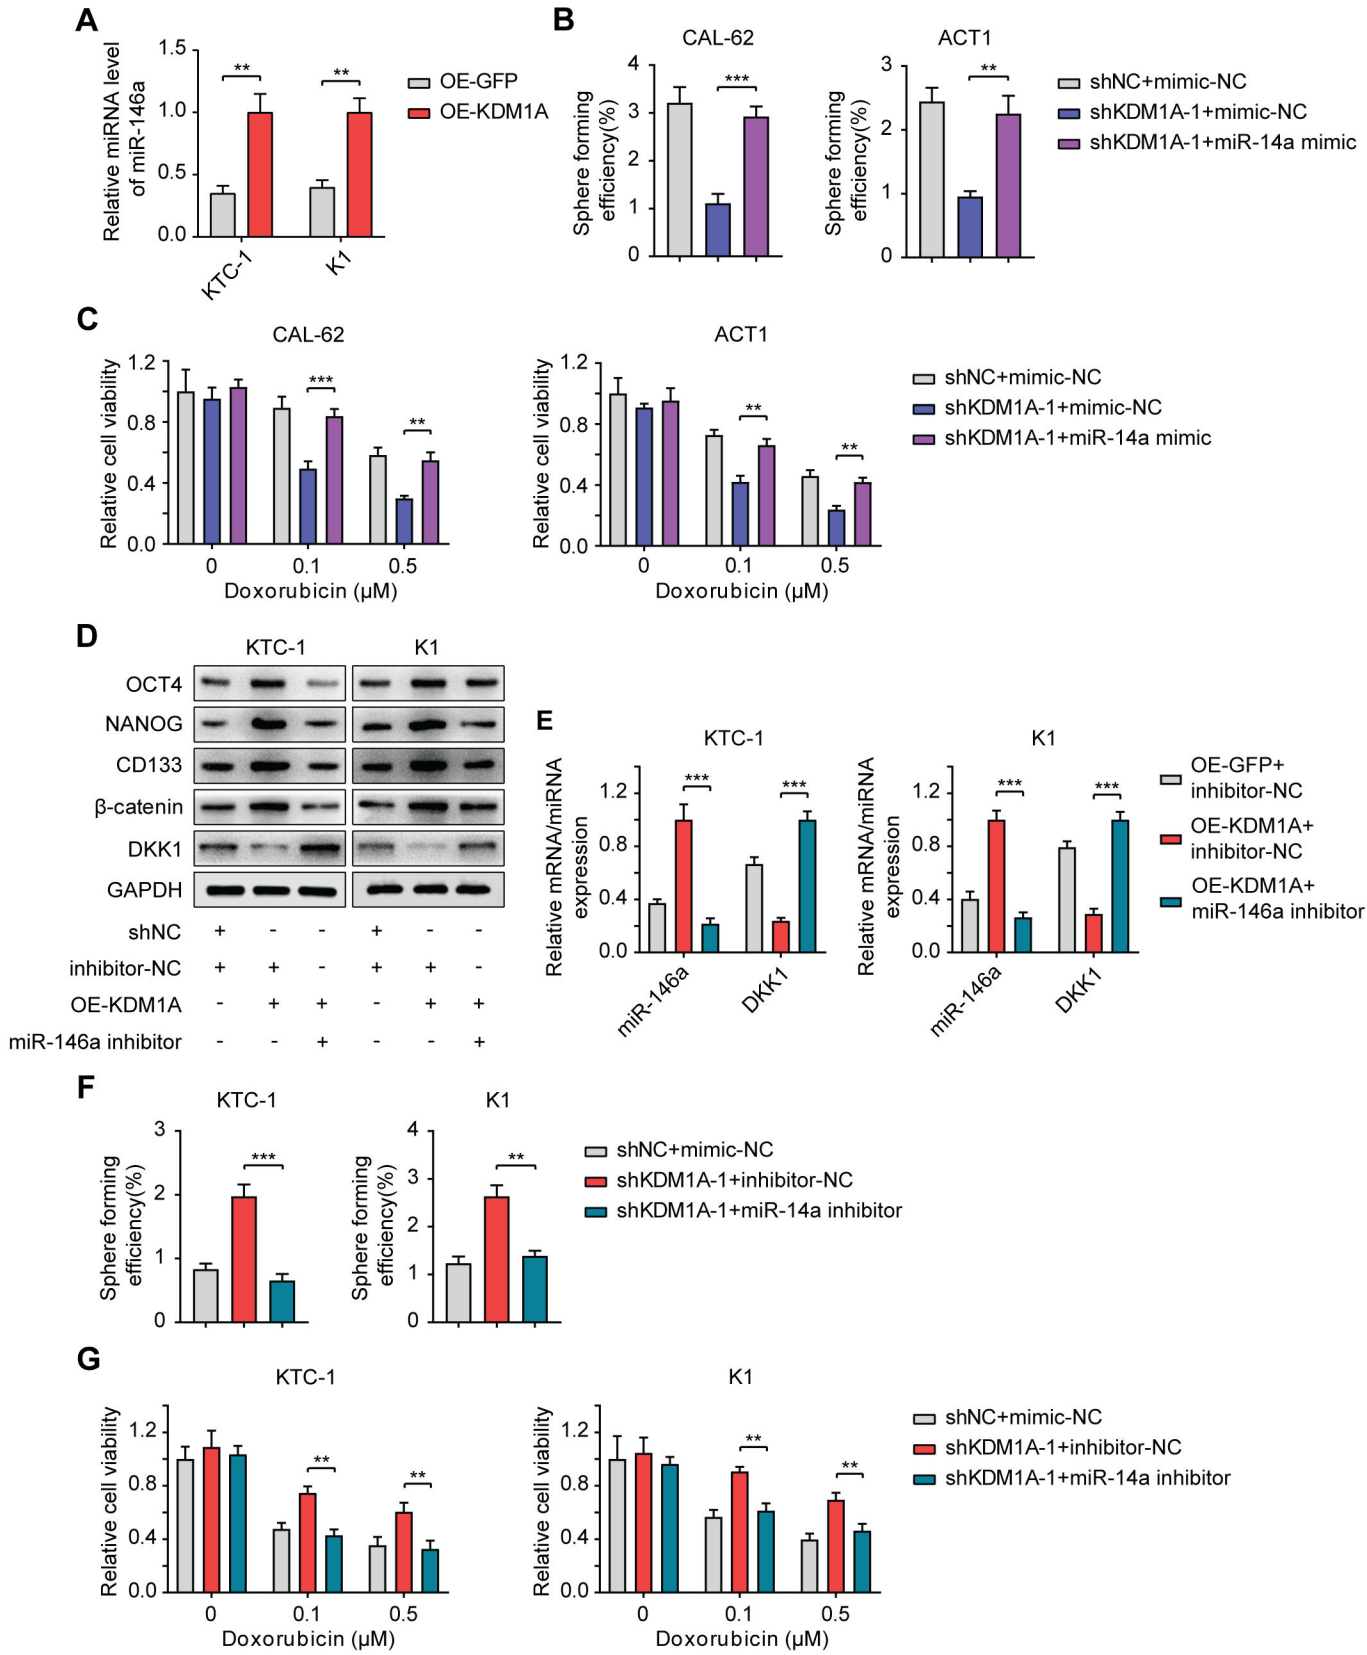

**Figure S10**

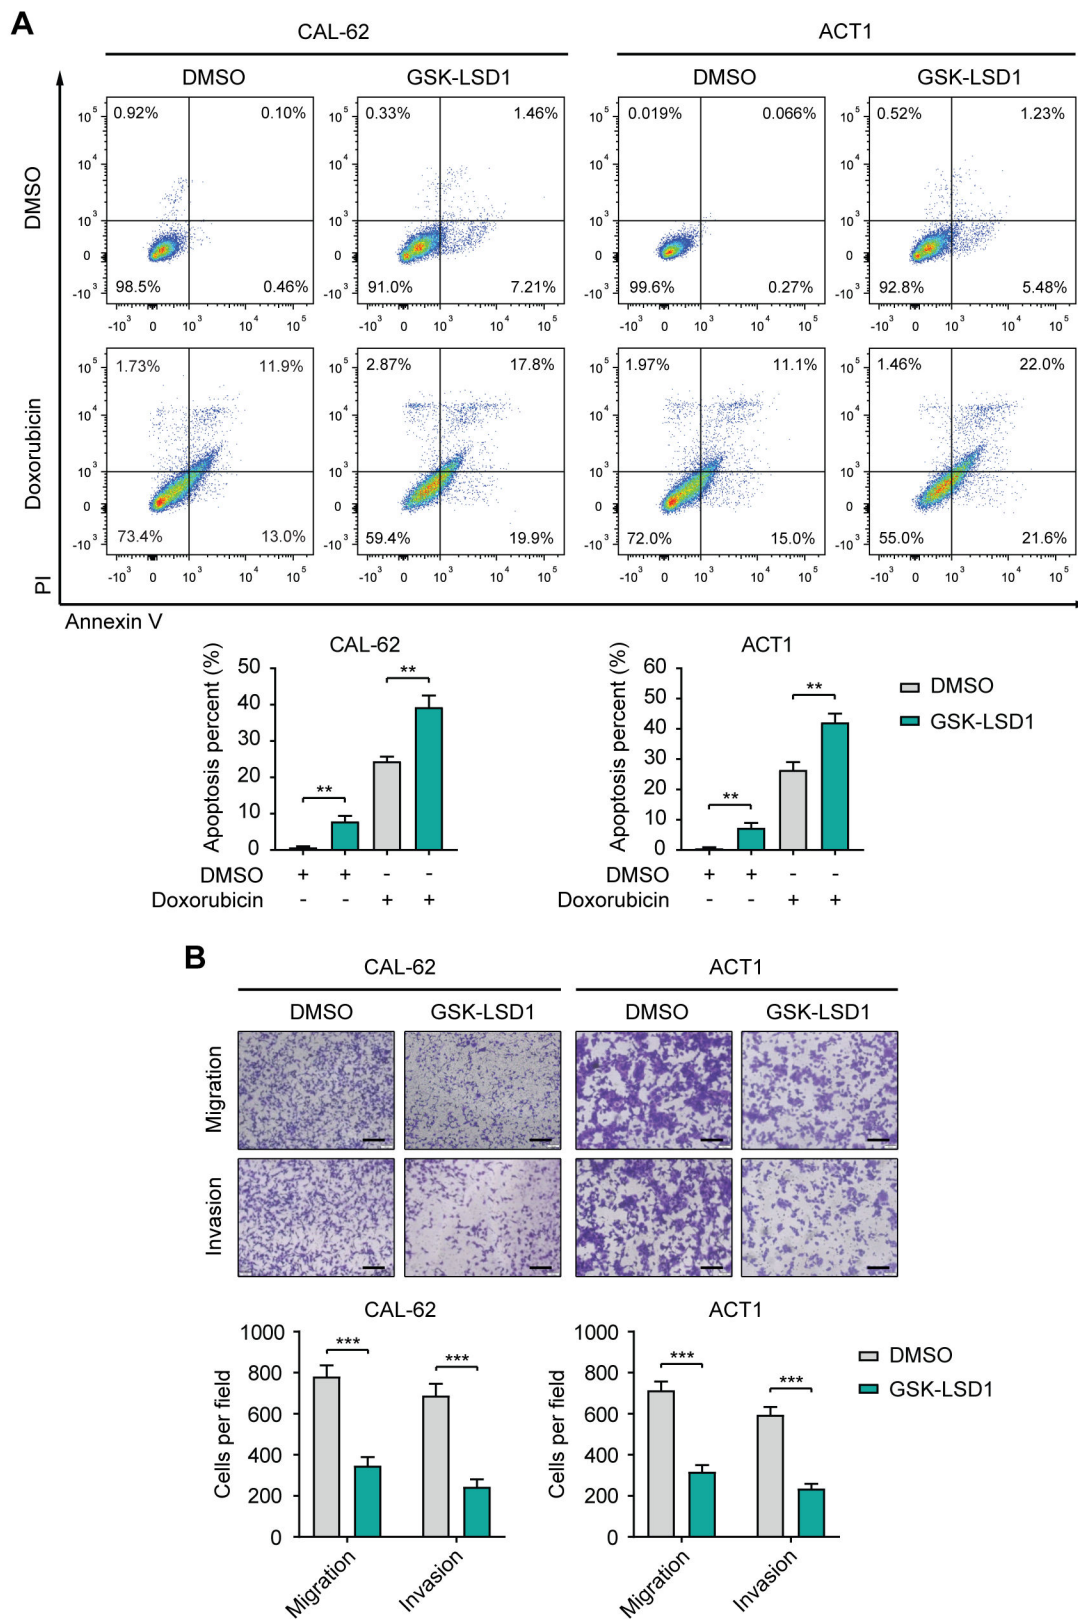

**Figure S11**

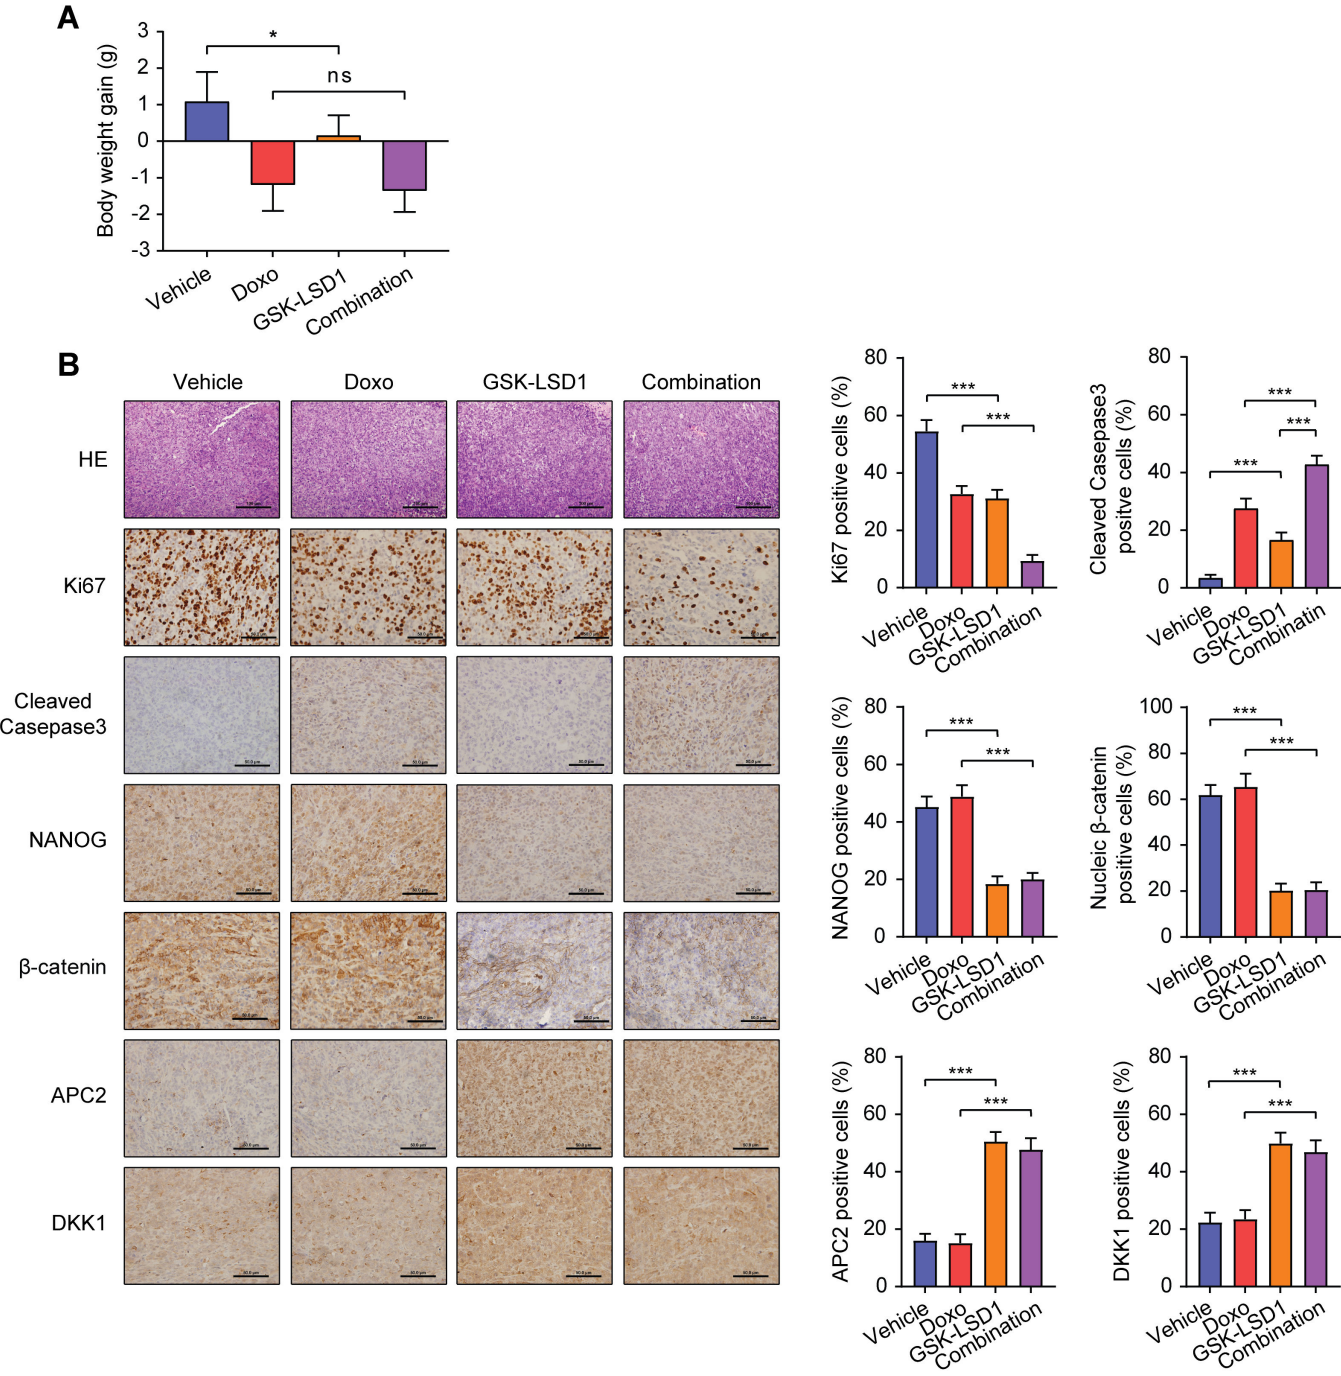

## Supplementary tables

**Table S1. The fold change (log2) of histone methylation modifiers expression in CSCs and no-CSCs (CSCs/no-CSCs)**

| Gene Name | BCPAP    | 8305C    | CAL-62   | Average fold change |
|-----------|----------|----------|----------|---------------------|
| KMT6      | -0.55967 | -0.379   | -0.007   | -0.315223333        |
| KMT3G     | 0.371    | -0.96733 | -0.18833 | -0.261553333        |
| KMT3E     | -0.31667 | -0.23933 | -0.05667 | -0.204223333        |
| KMT1B     | -0.12133 | -0.21267 | 0.445333 | 0.037111            |
| KMT7      | 1.389667 | -0.74233 | -0.51867 | 0.042889            |
| NO66      | 0.049333 | 0.008333 | 0.386667 | 0.148111            |
| KMT3C     | -0.00933 | 0.151    | 0.312667 | 0.151445667         |
| KDM5D     | 0.27382  | 0.475784 | 0.047667 | 0.265757            |
| KMT5B     | 0.083333 | 0.398333 | 0.36     | 0.280555333         |
| KMT5A     | 0.322667 | 0.174    | 0.39     | 0.295555667         |
| KDM4A     | 1.976667 | -0.65267 | 0.226    | 0.516665667         |
| KMT3F     | 0.722667 | 0.325333 | 0.555333 | 0.534444333         |
| KMT1A     | 1.266    | 0.399333 | -0.04267 | 0.540887667         |
| KMT4      | 1.448    | 0.046667 | 0.184    | 0.559555667         |
| KMT6B     | 1.013    | 0.246667 | 0.554    | 0.604555667         |
| KMT1E     | 0.811667 | 0.010667 | 1.087    | 0.636444667         |
| KDM7C     | 1.195667 | 0.314667 | 0.639667 | 0.716667            |
| KDM6A     | 1.071    | 0.042667 | 1.040333 | 0.718               |
| KMT5C     | 1.375    | 0.501333 | 0.294    | 0.723444333         |
| KDM3A     | 1.235667 | 0.888667 | 0.408333 | 0.844222333         |
| KMT1D     | 1.688667 | 0.533667 | 0.311667 | 0.844667            |
| KDM4C     | 1.412333 | 0.314667 | 1.202333 | 0.976444333         |
| KMT2H     | 2.193    | 0.693333 | 0.259333 | 1.048555333         |
| KMT1C     | 2.597667 | 1.094667 | -0.14967 | 1.180888            |
| KDM3C     | 1.189    | 1.129    | 1.37     | 1.229333333         |
| KMT3B     | 1.509667 | 1.880333 | 0.33     | 1.24                |
| KDM4B     | 1.966333 | 0.908333 | 0.846    | 1.240222            |
| KMT2A     | 1.850333 | 1.373    | 0.662    | 1.295111            |
| KDM2B     | 1.310667 | 2.441    | 0.244667 | 1.332111333         |
| KMT2      | 2.014333 | 0.226667 | 1.831333 | 1.357444333         |

|       |          |          |          |             |
|-------|----------|----------|----------|-------------|
| KMT8  | 2.24     | 1.154667 | 0.713667 | 1.369444667 |
| KDM5C | 2.117    | 3.112333 | 0.758667 | 1.996       |
| KDM1B | 1.353333 | 1.243667 | 3.426667 | 2.007889    |
| KDM5A | 2.039    | 1.307    | 3.340667 | 2.228889    |
| KDM6B | 2.828    | 2.959333 | 1.579333 | 2.455555333 |
| KDM1A | 1.702667 | 2.882833 | 2.921667 | 2.502389    |
| KDM5B | 2.368667 | 3.980333 | 3.284    | 3.211       |

**Table S2. Analysis of KDM1A expression and Clinicopathological features in PTC**

| Characteristic           | n     | KMD1A |    | $\chi^2$ | P-value |
|--------------------------|-------|-------|----|----------|---------|
|                          | (136) | +     | -  |          |         |
| Age, y                   |       |       |    |          |         |
| < 55                     | 26    | 64    | 46 | 2.142    | 0.143   |
| $\geq$ 55                | 110   | 11    | 15 |          |         |
| Gender                   |       |       |    |          |         |
| Male                     | 39    | 20    | 19 | 0.330    | 0.566   |
| Female                   | 97    | 55    | 2  |          |         |
| Multifocality            |       |       |    |          |         |
| No                       | 101   | 55    | 46 | 0.076    | 0.783   |
| Yes                      | 35    | 20    | 15 |          |         |
| BRAF<br>mutation         |       |       |    |          |         |
| Yes                      | 67    | 43    | 24 | 4.355    | 0.037   |
| No                       | 69    | 32    | 37 |          |         |
| Tumor size               |       |       |    |          |         |
| < 2cm                    | 112   | 61    | 51 | 0.120    | 0.729   |
| $\geq$ 2cm               | 24    | 14    | 10 |          |         |
| Lymph node<br>metastasis |       |       |    |          |         |
| Yes                      | 78    | 50    | 28 | 4.354    | 0.015   |
| No                       | 58    | 25    | 33 |          |         |
| TNM stage                |       |       |    |          |         |
| I-II                     | 116   | 67    | 49 | 2.175    | 0.140   |
| III-IV                   | 20    | 8     | 12 |          |         |

**Table S3. Multivariate analysis of lymph node metastasis and clinicopathological features in PTC**

| Characteristic                 | B      | S.E.  | Wals   | df | P     | OR     | 95% C.I. |       |
|--------------------------------|--------|-------|--------|----|-------|--------|----------|-------|
|                                |        |       |        |    |       |        | Lower    | Upper |
| Age                            | -0.060 | 0.026 | 5.399  | 1  | 0.020 | 0.942  | 0.895    | 0.991 |
| Gender                         | -0.752 | 0.451 | 2.774  | 1  | 0.096 | 0.472  | 0.195    | 1.142 |
| Multifocal-ity                 | 0.269  | 0.453 | 0.351  | 1  | 0.553 | 1.308  | 0.538    | 3.183 |
| BRAF <sup>V600E</sup> mutation | -1.399 | 0.420 | 11.070 | 1  | 0.001 | 0.247  | 0.108    | 0.563 |
| Tumor size                     | -0.916 | 0.534 | 2.940  | 1  | 0.086 | 0.400  | 0.140    | 1.140 |
| KDM1A expression               | 1.202  | 0.426 | 7.971  | 1  | 0.005 | 3.328  | 1.444    | 7.667 |
| Constant                       | 4.000  | 1.428 | 7.850  | 1  | 0.005 | 54.625 |          |       |

## **Additional file 1**

### **ALDEFLUOR assay**

Cells were analyzed by an ALDEFLUOR assay kit (Stemcell Technologies; Vancouver, BC, Canada) according to the manufacturer's protocol. Flow cytometry was performed on a FACS Calibur flow cytometer (BD Biosciences) and the data were analyzed by FlowJo software (version 10.0.7; FlowJo LLC, OR).

### **Cell viability assay**

Cells were seeded in 96-well culture plates at 2000 cells/well. After 12 h, cells were treated with drugs. After 48 h of treatment, cell viability was detected using a Cell Counting Kit-8 (SolarBio) according to the manufacturer's instructions.

### ***In vivo* studies**

All animal studies were approved by the Ethics Committee of the Tianjin Medical University Cancer Institute and Hospital. For the limiting dilution assay, varying amounts of CAL-62 cells with or without KDM1A knockdown were subcutaneously injected into 6-week-old female BALB/c nude mice. 6 weeks later, the number of mice that had developed tumors was counted. The frequency of CSCs was calculated using ELDA software. To establish a xenograft tumor model,  $2 \times 10^6$  cells were subcutaneously injected into 6-week-old female BALB/c nude mice. After the average size of tumors reached 50 cm<sup>3</sup>, we measure the growth of the tumors every two or three days. The treatment of each group is described below. All the mice were purchased from SPF Biotechnology (Beijing, China).

### **Coimmunoprecipitation (Co-IP)**

The cells were lysed in IP lysis buffer (Thermo Scientific, USA) containing protease inhibitor cocktail. The cell lysates were incubated with anti- $\beta$ -catenin antibody at 4 °C overnight, and immunoprecipitated with protein A+G-Sepharose beads (Thermo Scientific, USA) with shaking at 4 °C for 2 h. The beads were washed three times with IP lysis buffer. The immunoprecipitates were eluted and analyzed by western blotting.

### **Immunofluorescence**

Cells were fixed to coverslips with 4% paraformaldehyde.  $\beta$ -catenin protein was then stained with its specific antibodies and fluorescent second antibodies. After that, the cells were stained with DAPI (4',6-diamidino-2-phenylindole). Finally, the slides were observed under a fluorescence microscope.

### **TOP/FOP flash reporter assay**

The TOP/FOP-Flash reporter and pTK-RL plasmids were cotransfected into cells. After transfection for 48 h, a Dual - Luciferase Assay Kit (Promega) was utilized according to the

manufacturer's instructions to detect the activities of both the firefly and Renilla luciferase reporters. TOP - Flash and FOP-Flash reporter activity levels were calculated as the relative ratio of firefly luciferase activity to Renilla luciferase activity.

#### **Dual-luciferase report assay**

The WT-DKK1-3'UTR and MUT-DKK1-3'UTR reporter plasmids containing the human DKK1 3'-UTR sequence with wild-type or mutant-type miR-146a binding sites were constructed respectively. Then, the WT-DKK1 or MUT-DKK1 reporter were cotransfected with mimic-NC or miR-146a into CAL-62 cells with or without KDM1A knockdown. After transfection for 48 h, the cells were harvested to assess the luciferase activity using the Dual-Glo Luciferase system (Promega).

#### **Transwell assay**

In vitro cell migration assays were performed using polycarbonate membrane Transwell chamber (8 mm pore size; Corning, USA) in 24-well plates. RPMI 1640 medium (500  $\mu$ L) containing 20% FBS was added to the lower chamber. The 150  $\mu$ L cell suspension ( $1 \times 10^6$  cells/mL) deprived of serum was cultured in the upper chamber at 37 °C with 5% CO<sub>2</sub> for 24 h. The Transwell chamber was fixed in 5% glutaraldehyde and stained with 0.1% crystal violet. For the in vitro cell invasion assay, the Transwell chamber was coated with Matrigel (BD Biosciences, USA) before adding the cell suspension.

#### **Assessment of apoptosis**

The rates of apoptotic cells were measured by flow cytometry after staining with Annexin V/propidium iodide (BD Pharmingen, Franklin Lakes, USA). The data were analyzed using FlowJo software (version 10.0.7).

## Additional file 2

### 1. Primers for RT-qPCR

| Name           | Forward Primer (5'-3')  | Reverse Primer (5'-3')  |
|----------------|-------------------------|-------------------------|
| $\beta$ -actin | GCATGGGTCAGAAGGATTTCCT  | TCGTCCCAGTTGGTGACGAT    |
| NANOG          | ACCTATGCCTGTGATTGTGG    | AGTGGGTTGTTTGCCTTTGG    |
| OCT4           | TCCACTTTGTATAGCCGCTGG   | TGCATACACACAAACACAGCAA  |
| SOX2           | TCAGGAGTTGTCAAGGCAGAG   | CGCCGCCGATGATTGTTATTA   |
| CD133          | AGTCGGAAACTGGCAGATAGC   | GGTAGTGTTGTACTGGGCCAAT  |
| CD44           | CTGCCGCTTTCAGGTGTA      | CATTGTGGGCAAGGTGCTATT   |
| ALDH1          | CCGTGGCGTACTATGGATGC    | GCAGCAGACGATCTCTTTCGAT  |
| KMT2F          | CAGTGGCGGAATAACAAGCTC   | CATAGCGGTACACCTTCTGAGA  |
| KMT2A          | TCTCCTCGCGGATCATTAAGA   | GGTGTAGACTCTAATCGGGCAA  |
| KMT7           | TCACGGAGAAAAGAACGGACG   | ATCATCCACATAATACCCCTCCA |
| KMT3C          | GAATCCCTCGGAGACTGTAAGA  | CGAAGGTGTTCTCTCTGGGT    |
| KMT3E          | TTCACCATCTGTAATGCGGAGA  | ACACAATCGAACAGTTGGGGT   |
| KMT2H          | AACTGTCTTCAAAACGAGAC    | GAAGAGTAGATGGCGTTGCATTA |
| KMT1A          | CCTGCCCTCGGTATCTCTAAG   | ATATCCACGCCATTTACCAG    |
| KMT1B          | TCTATGACAACAAGGGAATCACG | GAGACACATTGCCGTATCGAG   |
| KMT1C          | TCCAATGACACATCTTCGCTG   | CTGATGCGGTCAATCTTGGG    |
| KMT1D          | CATGCAGCCAGTAAAGATCCC   | CTGCTGTCGTCCAAAGTCAG    |
| KMT1E          | TAAGACTTGGCACAAGGCAC    | TCCCCGACAGTAGACTCTTTC   |
| KMT8           | AATTTGGGATGGATGTGCATTG  | GGCGCGATTGGCTTTAAAGT    |
| KMT6B          | GTCACTGAACACAGTTGCATTG  | TGCACAAAACCGTCTCATCTTC  |
| KMT6           | AATCAGAGTACATGCGACTGAGA | GCTGTATCCTTCGCTGTTTCC   |
| KMT3B          | GAGCTACCTGTCCTTAGGAGAA  | GAATCAGGATCATTTGTGCAGT  |
| KMT3G          | TTATTCCAGCCGACAAGCTGA   | CGCAGTTTGGCATCGTGTG     |
| KMT3F          | CAGTACCCAGCTACAACAGAAG  | CATTGGCTGACCCATTAGGATAC |
| KMT4           | CTGCCGGTCTACGATAAACATC  | AGCTTGAGATCCGGGATTTC    |
| KMT5A          | ACAAATGCTCTGGAATGCGTT   | CCGGCTAATGGTTTCCCTG     |
| KMT5B          | GAGAAATGGAGGCAAGTTGTCT  | ACATAGCGACTCTGTCCTTCA   |
| KMT5C          | CGCCTTCATCAACCATGACTG   | GCCGTAGAAGCATGTCACC     |
| KDM1A          | TGACCGGATGACTTCTCAAGA   | GTTGGAGAGTAGCCTCAAATGTC |
| KDM1B          | CTCTCCTGTGGGGAACATTC    | GACTAGGTTCGGTTTTGCCATT  |

|                |                           |                         |
|----------------|---------------------------|-------------------------|
| KDM5A          | GTCTAAAGTGGGTAGTCGCTTG    | GTTTGGGTATCAGTGCTGAGAA  |
| KDM5B          | AGTGGGCTCACATATCAGAGG     | CAAACACCTTAGGCTGTCTCC   |
| KDM5C          | TCAGTGACAGTAAACGGCACC     | ACACCGGCATCACATTTAGGT   |
| KDM5D          | CAAGACCCGCTTGGCTACATT     | TTGGACGCGAGGAGTAAATCT   |
| NO66           | CGCTACATCAACGGACGAC       | CAAAGCCCTGCGAGTTAGG     |
| KDM3A          | ACAGTGGCCTGCAATAACGTA     | TCCCAGAAAGCGAACAGAAGT   |
| KDM3C          | TAACTCCTGCACCCCATTACT     | ATGAGCACTCTCTAGTCGTGG   |
| KDM4A          | ATCCCAGTGCTAGGATAATGACC   | ACTCTTTTGGAGGAACAACCTTG |
| KDM4B          | ACTTCAACAAATACGTGGCCTAC   | CGATGTCATCATACGTCTGCC   |
| KDM4C          | CGAGGTGGAAGTCCTCTGAA      | GGGCTCCTTTAGACTCCATGTAT |
| KDM7C          | CTCCCCTACGACGTTACCC       | CAGTGGTATATGTCGATGTCGG  |
| KDM6B          | TTGGGCAACTGTACGAGTCAG     | CCATAGTTCCGTTTGTGCTCAAG |
| KDM6A          | GGACATGCTGTGTCACATCCT     | CTCCTGTTGGTCTCATTGGTG   |
| KDM2B          | GGGTTCCCCTGATATTTGAGA     | GCTCCCCACTAGGAGTTTGAC   |
| CCND1          | CGTGGGCTCTAAGATGAAGG      | TGCGGATGATCTGTTTGTTT    |
| C-MYC          | GGCTCCTGGCAAAAGGTCA       | CTGCGTAGTTGTGCTGATGT    |
| CTNNB1         | GCGCCATTTTAAGCCTCTCG      | AAATACCCTCAGGGGAACAGG   |
| DKK1           | CCTTGAACCTCGGTTCTCAATTCC  | CAATGGTCTGGTACTTATCCCCG |
| APC2           | CTGAAGCACCTACAGGGAAAA     | CTGGAACTTGAGGTTGTACAGG  |
| HIF-1 $\alpha$ | CTCAAAGTCGGACAGCCTCA      | CCCTGCAGTAGGTTTCTGCT    |
| miR-146a       | GACAGGGTCTCTCTCTGTG       | CTAGCCTGGGCAACATGGA     |
| U6             | GCTTCGGCAGCACATATACTAAAAT | CGCTTCACGAATTTGCGTGTCAT |

## 2. Sequences of siRNA and shRNA

| Name      | Sequence (5'-3')          |
|-----------|---------------------------|
| shKDM1A-1 | CACAAGGAAAGCTAGAAGA       |
| shKDM1A-2 | AACAATTAGAAGCACCTTA       |
| siNC      | UUCUCCGAACGUGUCACGUTT     |
| siAPC2-1  | CCUACAGGGAAAACUGGAGTT     |
| siAPC2-2  | CUGAAGAUGAUGAAAGUAAUU     |
| siDKK1-1  | TGATAGCCCTGTACAATGCTGCT   |
| siDKK1-2  | CGAUUUGGAGGUACCAUAAAGGAUU |

### 3. Primers for ChIP-qPCR

| Name     | Forward Primer (5'-3')   | Reverse Primer (5'-3')      |
|----------|--------------------------|-----------------------------|
| APC2 P1  | GAGCTTGCAGTGAGCCGAGAAC   | GAAAAGATCCCCTGTGTCTGCCC     |
| APC2 P2  | AGACAGCCAGGCCGAAG        | CTTCCCACCCTCTCCTATCATT      |
| APC2 P3  | CCCTTTCTGTGCTGTGAGTCTGTG | GGACACCTGGAGATGGCGACT       |
| APC2 P4  | GAGACAGAAAGAGAGAGGGGACAT | TGGACCCGAACCCTGTC           |
| APC2 P5  | CCCCGCCAAGATGCTGATGTAAC  | CAGACGCAGGAGGTTTAAAGAGGC    |
| APC2 P6  | ACACAGGAATCTTGGTCCTC     | CTGTCTCACCCGCATCC           |
| APC2 P7  | AGCAGAGCCAGAAAGCAGAAACTG | CAAGGGAGGGCAGGCTCCAG        |
| DKK1 P1  | CCCACCACCCATCTCACCAA     | CAATGCCAGGGCTCTAGGCT        |
| DKK1 P2  | CGTGGTCCCGTGCAAGGTAAG    | CACATTAGCCCACCACTGAGAAGG    |
| DKK1 P3  | GACTGACCTGGCACGTTGGAC    | CAAGTTCATCTACCGCCGCGATT     |
| DKK1 P4  | GGGCAACTGAAGGACCTCAAAGC  | CAACTTGCACCCGCCACCTG        |
| DKK1 P5  | CAGGCAAGGGCACCCAAGTTC    | GTCTGCTATAACGCTCGCTGGTAG    |
| DKK1 P6  | CCTCCCAGCGCTTTGAAAT      | GTATAAAGGCAGCCGCGG          |
| DKK1 P7  | ACTGCATGCAAAGCAGACTTGT   | TCACAAATCCTTCCTCATTCCTACTCT |
| miR-146a | GACAGGGTCTCTCTCTGTG      | CTAGCCTGGGCAACATGGA         |

### 4. Antibodies used in this study

| Antibodies name             | Application | Supplier                  | Cat #    |
|-----------------------------|-------------|---------------------------|----------|
| Anti-human KDM1A antibody   | WB, IHC     | abcam                     | ab129195 |
| Anti-human GAPDH antibody   | WB          | Cell Signaling Technology | 5174     |
| Anti-human OCT4 antibody    | WB          | Cell Signaling Technology | 2750     |
| Anti-human CD133 antibody   | WB          | Cell Signaling Technology | 64326    |
| Anti-human NANOG antibody   | WB, IHC     | Cell Signaling Technology | 4903     |
| Anti-human H3K4me1 antibody | WB, ChIP    | Cell Signaling Technology | 5326     |
| Anti-human H3K4me2 antibody | WB          | Cell Signaling Technology | 9725     |

|                                        |                 |                           |          |
|----------------------------------------|-----------------|---------------------------|----------|
| Anti-human H3K4me3 antibody            | WB              | Cell Signaling Technology | 9751     |
| Anti-human H3K9me1 antibody            | WB              | Cell Signaling Technology | 14186    |
| Anti-human H3K9me2 antibody            | WB              | Cell Signaling Technology | 4658     |
| Anti-human H3K9me3 antibody            | WB              | Cell Signaling Technology | 13969    |
| Anti-human H3 antibody                 | WB              | Cell Signaling Technology | 4499     |
| Anti-human Ki67 antibody               | IHC             | Cell Signaling Technology | 9449     |
| Anti-human Cleaved caspase-3 antibody  | IHC             | Cell Signaling Technology | 9661     |
| Anti-human APC2 antibody               | WB, IHC         | abcam                     | ab113370 |
| Anti-human DKK1 antibody               | WB, IHC         | abcam                     | ab109416 |
| Anti-human CCND1 antibody              | WB, IHC         | Cell Signaling Technology | 55506    |
| Anti-human C-MYC antibody              | WB, IHC         | Cell Signaling Technology | 18583    |
| Anti-human $\beta$ -catenin antibody   | WB, IHC, IP, IF | Cell Signaling Technology | 8480     |
| Anti-human HIF-1 $\alpha$ antibody     | WB, IP, ChIP    | Cell Signaling Technology | 36169    |
| Anti-human pan methyl Lysine antibody  | WB              | abcam                     | ab7315   |
| Anti-human ubiquitination antibody     | WB              | abcam                     | ab140601 |
| Goat Anti-Rabbit IgG (HRP)             | WB              | abcam                     | ab6721   |
| Normal Rabbit IgG                      | ChIP            | Cell Signaling Technology | 2729     |
| Cy3-labeled Goat Anti-Rabbit IgG (H+L) | IF              | Beyotime                  | A0516    |
